# Supplementary material for: Health and health risk behaviour of adolescents—Differences according to family structure. Results of the German KiGGS cohort study
Source: PubMed Central journal article supplement (PMC5841741; doi:10.1371/journal.pone.0192968), 2018-03-07
Supplement: pone.0192968.s001.pdf [file pone.0192968.s001.pdf]

**S1 Table. Comparison of baseline sample characteristics (t0) of all KiGGS baseline responders and KiGGS Wave 1 responders aged 4 to 12 years (weighted proportions or means).\***

|                                                      | <b>All KiGGS baseline-responder<sup>1</sup></b><br>n=10,902 | <b>KiGGS Wave 1-responder<sup>2</sup></b><br>n=4,756 |
|------------------------------------------------------|-------------------------------------------------------------|------------------------------------------------------|
|                                                      | <b>% (95% CI)</b>                                           | <b>% (95% CI)</b>                                    |
| Sex (t0)                                             |                                                             |                                                      |
| Girls                                                | 48.7 (48.2-49.2)                                            | 48.5 (47.0-50.0)                                     |
| Boys                                                 | 51.3 (50.8-51.8)                                            | 51.5 (50.0-53.0)                                     |
| Family form (t0)                                     |                                                             |                                                      |
| Nuclear family                                       | 81.9 (80.5-83.1)                                            | 81.7 (79.6-83.6)                                     |
| Single parent family                                 | 11.3 (10.3-12.4)                                            | 11.0 (9.5-12.7)                                      |
| Stepfamily                                           | 6.9 (6.3-7.5)                                               | 7.3 (6.2-8.5)                                        |
|                                                      | <b>Mean (SE)</b>                                            | <b>Mean (SE)</b>                                     |
| Family cohesion (t0)                                 | 77.00 (0.20)                                                | 76.94 (0.32)                                         |
| SES (t0)                                             | 11.02 (0.09)                                                | 11.38 (0.11)                                         |
| Parent-rated general health (t0)                     | 1.69 (0.01)                                                 | 1.65 (0.01)                                          |
| Parent-rated emotional and behavioural problems (t0) | 8.74 (0.07)                                                 | 8.48 (0.11)                                          |

\* KiGGS Wave 1 population: re-participants who were aged 4 to 12 at baseline; not fully equivalent with the study sample used in this analysis, which comprised only participants aged 11 to 17 years at t1.

<sup>1</sup> Cross-sectional weighting factor for the baseline survey (population as of 31 December, 2004).

<sup>2</sup> Longitudinal weighting factor to compensate for the probability of re-participation and to adjust to the population level at the time of the baseline survey (31 December, 2004).
