# Supplementary material for: Health and health risk behaviour of adolescents—Differences according to family structure. Results of the German KiGGS cohort study
Source: PubMed Central journal article supplement (PMC5841741; doi:10.1371/journal.pone.0192968), 2018-03-07
Supplement: pone.0192968.s002.pdf [file pone.0192968.s002.pdf]

**S2 Table. Results from the linear regression models on health-related quality of life with interaction between family status and sex. Adolescents aged 11 to 17 years.**

| Health-related quality of life                   | Model 1 |         | Model 2 |         | Model 3 |         | Model 4 |         | Standardized Coefficients |
|--------------------------------------------------|---------|---------|---------|---------|---------|---------|---------|---------|---------------------------|
|                                                  | Coeff.  | P-value | Coeff.  | P-Value | Coeff.  | P-Value | Coeff.  | P-Value |                           |
| <b>Family status (baseline → follow-up)</b>      |         |         |         |         |         |         |         |         |                           |
| Nuclear → Nuclear                                | Ref     |         | Ref     |         | Ref     |         | Ref     |         |                           |
| Nuclear → Single parent                          | 1.33    | 0.148   | 1.25    | 0.180   | 0.40    | 0.645   | 0.42    | 0.624   | 0.011                     |
| Nuclear → Step                                   | 2.71    | 0.024   | 2.71    | 0.025   | 2.87    | 0.029   | 2.89    | 0.035   | 0.045                     |
| Single parent → Single parent                    | 0.95    | 0.312   | 0.88    | 0.345   | 0.38    | 0.676   | 0.13    | 0.877   | 0.004                     |
| Single parent → Step                             | 0.05    | 0.955   | -0.01   | 0.992   | -0.40   | 0.643   | -0.61   | 0.482   | -0.012                    |
| Step → Step                                      | 0.74    | 0.524   | 0.73    | 0.529   | 0.24    | 0.793   | -0.20   | 0.837   | -0.005                    |
| Step → Single parent                             | -0.72   | 0.562   | -0.93   | 0.463   | 0.48    | 0.655   | 0.13    | 0.914   | 0.002                     |
| <b>Interaction between family status and sex</b> |         |         |         |         |         |         |         |         |                           |
| Nuclear → Nuclear # female                       | Ref     |         | Ref     |         | Ref     |         | Ref     |         |                           |
| Nuclear → Single parent # female                 | 0.51    | 0.715   | 0.52    | 0.706   | -0.35   | 0.775   | -0.29   | 0.807   | -0.006                    |
| Nuclear → Step # female                          | -3.93   | 0.062   | -3.95   | 0.061   | -5.32   | 0.014   | -5.24   | 0.019   | -0.057                    |
| Single parent → Single parent # female           | 1.32    | 0.303   | 1.27    | 0.322   | 1.40    | 0.271   | 1.30    | 0.305   | 0.028                     |
| Single parent → Step # female                    | 4.39    | 0.025   | 4.42    | 0.023   | 3.48    | 0.042   | 3.33    | 0.042   | 0.047                     |
| Step → Step # female                             | 1.38    | 0.348   | 1.46    | 0.323   | 1.39    | 0.319   | 1.50    | 0.275   | 0.025                     |
| Step → Single parent # female                    | 5.49    | 0.021   | 5.47    | 0.021   | 2.14    | 0.274   | 2.18    | 0.286   | 0.026                     |
| Sex: female                                      | 2.19    | 0.000   | 2.17    | 0.000   | 2.03    | 0.000   | 2.28    | 0.000   | 0.133                     |
| Age (t1)                                         | 0.77    | 0.000   | 0.75    | 0.000   | 0.61    | 0.000   | 0.61    | 0.000   | 0.142                     |
| Socio-economic status (t0)                       |         |         | -0.08   | 0.071   | -0.06   | 0.166   | 0.01    | 0.826   | 0.004                     |
| Socio-economic status (t1-t0)                    |         |         | -0.08   | 0.300   | -0.07   | 0.266   | -0.04   | 0.507   | -0.012                    |
| Family cohesion (t0)                             |         |         |         |         | -0.22   | 0.000   | -0.19   | 0.000   | -0.336                    |
| Family cohesion (t1-t0)                          |         |         |         |         | -0.21   | 0.000   | -0.21   | 0.000   | -0.482                    |
| Parent-rated health (t0)                         |         |         |         |         |         |         | 0.33    | 0.178   | 0.023                     |
| Emotional & behavioural problems (t0)            |         |         |         |         |         |         | 0.17    | 0.000   | 0.106                     |

Range of values: 1 (high HRQoL) – 100 (low HRQoL)
